# Supplementary material for: Pharmacoproteomics of Brain Barrier Transporters and Substrate Design for the Brain Targeted Drug Delivery
Source: PubMed Central journal article supplement (PMC9246989; doi:10.1007/s11095-022-03193-2), 2022-03-07
Supplement: 11095_2022_3193_MOESM1_ESM.pdf [file 11095_2022_3193_MOESM1_ESM.pdf]

# Supporting Information

## Pharmacoproteomics of Brain Barrier Transporters and Substrate Design for the Brain Targeted Drug Delivery

*Kristiina M. Huttunen<sup>1,\*</sup>, Tetsuya Terasaki<sup>1,\*\*</sup>, Arto Urtti<sup>1</sup>, Ahmed B. Montaser<sup>1</sup>, Yasuo  
Uchida<sup>2</sup>*

<sup>1</sup> School of Pharmacy, Faculty of Health Sciences, University of Eastern Finland,  
P.O. Box 1627, FI-70211 Kuopio, Finland

<sup>2</sup>Graduate School of Pharmaceutical Sciences, Tohoku University,  
6-3 Aoba, Aramaki, Aoba-ku, Sendai, 980-8578, Japan

\* Corresponding author, E-mail: [kristiina.huttunen@uef.fi](mailto:kristiina.huttunen@uef.fi), ORCID: 0000-0002-1175-8517

\*\* Corresponding author, E-mail: [tetsuya.terasaki@uef.fi](mailto:tetsuya.terasaki@uef.fi), ORCID: 0000-0002-6332-7575

### Contents

|                                                                                             |   |
|---------------------------------------------------------------------------------------------|---|
| <b>Table S1.</b> Prediction of $K_{p,uu,brain,MDR1,human}$ of MDR1 substrate in human. .... | 2 |
| <b>Table S2.</b> Prediction of $K_{p,uu,brain,BCRP,human}$ of BCRP substrate in human. .... | 3 |

**Table S1.** Prediction of  $K_{p,uu,brain,MDR1,human}$  of MDR1 substrate in human.

| Rat<br>$K_{p,uu,brain,MDR1,rat}$ | Rat<br>$TA_{vivo,MDR1,rat}P_{passive,vivo,MDR1,rat}$ | Human<br>$K_{p,uu,brain,MDR1,human}$ | Ratio<br>$K_{p,uu,brain,MDR1,human}/K_{p,uu,brain,MDR1,rat}$ |
|----------------------------------|------------------------------------------------------|--------------------------------------|--------------------------------------------------------------|
| $1.00 \times 10^{-4}$            | 20.1                                                 | $9.87 \times 10^{-4}$                | 9.87                                                         |
| $5.00 \times 10^{-4}$            | 4.02                                                 | $4.92 \times 10^{-3}$                | 9.84                                                         |
| $1.00 \times 10^{-3}$            | 2.01                                                 | $9.79 \times 10^{-3}$                | 9.79                                                         |
| $5.00 \times 10^{-3}$            | $4.00 \times 10^{-1}$                                | $4.73 \times 10^{-2}$                | 9.46                                                         |
| $1.00 \times 10^{-2}$            | $1.99 \times 10^{-1}$                                | $9.07 \times 10^{-2}$                | 9.07                                                         |
| $2.00 \times 10^{-2}$            | $9.86 \times 10^{-2}$                                | $1.68 \times 10^{-1}$                | 8.39                                                         |
| $3.00 \times 10^{-2}$            | $6.51 \times 10^{-2}$                                | $2.34 \times 10^{-1}$                | 7.80                                                         |
| $4.00 \times 10^{-2}$            | $4.83 \times 10^{-2}$                                | $2.92 \times 10^{-1}$                | 7.29                                                         |
| $5.00 \times 10^{-2}$            | $3.82 \times 10^{-2}$                                | $3.42 \times 10^{-1}$                | 6.84                                                         |
| $6.00 \times 10^{-2}$            | $3.15 \times 10^{-2}$                                | $3.86 \times 10^{-1}$                | 6.45                                                         |
| $7.00 \times 10^{-2}$            | $2.67 \times 10^{-2}$                                | $4.27 \times 10^{-1}$                | 6.09                                                         |
| $8.00 \times 10^{-2}$            | $2.31 \times 10^{-2}$                                | $4.62 \times 10^{-1}$                | 5.78                                                         |
| $9.00 \times 10^{-2}$            | $2.03 \times 10^{-2}$                                | $4.94 \times 10^{-1}$                | 5.49                                                         |
| $1.00 \times 10^{-1}$            | $1.81 \times 10^{-2}$                                | $5.23 \times 10^{-1}$                | 5.23                                                         |
| $2.00 \times 10^{-1}$            | $8.05 \times 10^{-3}$                                | $7.12 \times 10^{-1}$                | 3.56                                                         |
| $3.00 \times 10^{-1}$            | $4.69 \times 10^{-3}$                                | $8.09 \times 10^{-1}$                | 2.70                                                         |
| $4.00 \times 10^{-1}$            | $3.02 \times 10^{-3}$                                | $8.68 \times 10^{-1}$                | 2.17                                                         |
| $5.00 \times 10^{-1}$            | $2.01 \times 10^{-3}$                                | $9.08 \times 10^{-1}$                | 1.81                                                         |
| $6.00 \times 10^{-1}$            | $1.34 \times 10^{-3}$                                | $9.37 \times 10^{-1}$                | 1.56                                                         |
| $7.00 \times 10^{-1}$            | $8.62 \times 10^{-4}$                                | $9.58 \times 10^{-1}$                | 1.37                                                         |
| $8.00 \times 10^{-1}$            | $5.03 \times 10^{-4}$                                | $9.75 \times 10^{-1}$                | 1.22                                                         |
| $9.00 \times 10^{-1}$            | $2.24 \times 10^{-4}$                                | $9.89 \times 10^{-1}$                | 1.10                                                         |
| $9.90 \times 10^{-1}$            | $2.03 \times 10^{-5}$                                | $9.99 \times 10^{-1}$                | 1.01                                                         |

Changing  $K_{p,uu,brain,MDR1,rat}$  from  $1.00 \times 10^{-4}$  to  $9.90 \times 10^{-1}$  with  $PEL_{MDR1,rat}$  of rat cerebrum ( $497 \text{ fmol/cm}^2$ ),  $TA_{MDR1, rat, vivo}/P_{passive, rat, vivo}$  was estimated by Eq. 5. Assuming  $RTA_{MDR1, human/rat}$  is 1.0,  $K_{p,uu,brain,MDR1, human}$  was predicted by Eq. 7 with  $PEL_{MDR1, human}$  of human cerebral cortex ( $50.3 \text{ fmol/cm}^2$ ).

**Table S2.** Prediction of  $K_{p,uu,brain,BCRP,human}$  of BCRP substrate in human.

| Rat<br>$K_{p,uu,brain,BCRP,rat}$ | Rat<br>$TA_{vivo,BCRP,rat}/P_{passive,vivo,BCRP,rat}$ | Human<br>$K_{p,uu,brain,BCRP,human}$ | Ratio<br>$K_{p,uu,brain,BCRP,human}/K_{p,uu,brain,BCRP,rat}$ |
|----------------------------------|-------------------------------------------------------|--------------------------------------|--------------------------------------------------------------|
| $1.00 \times 10^{-4}$            | 46.1                                                  | $5.23 \times 10^{-4}$                | 5.23                                                         |
| $5.00 \times 10^{-4}$            | 9.21                                                  | $2.61 \times 10^{-3}$                | 5.22                                                         |
| $1.00 \times 10^{-3}$            | 4.60                                                  | $5.21 \times 10^{-3}$                | 5.21                                                         |
| $5.00 \times 10^{-3}$            | $9.17 \times 10^{-1}$                                 | $2.56 \times 10^{-2}$                | 5.12                                                         |
| $1.00 \times 10^{-2}$            | $4.56 \times 10^{-1}$                                 | $5.02 \times 10^{-2}$                | 5.02                                                         |
| $2.00 \times 10^{-2}$            | $2.26 \times 10^{-1}$                                 | $9.64 \times 10^{-2}$                | 4.82                                                         |
| $3.00 \times 10^{-2}$            | $1.49 \times 10^{-1}$                                 | $1.39 \times 10^{-1}$                | 4.64                                                         |
| $4.00 \times 10^{-2}$            | $1.11 \times 10^{-1}$                                 | $1.79 \times 10^{-1}$                | 4.47                                                         |
| $5.00 \times 10^{-2}$            | $8.76 \times 10^{-2}$                                 | $2.16 \times 10^{-1}$                | 4.32                                                         |
| $6.00 \times 10^{-2}$            | $7.22 \times 10^{-2}$                                 | $2.50 \times 10^{-1}$                | 4.17                                                         |
| $7.00 \times 10^{-2}$            | $6.12 \times 10^{-2}$                                 | $2.82 \times 10^{-1}$                | 4.03                                                         |
| $8.00 \times 10^{-2}$            | $5.30 \times 10^{-2}$                                 | $3.13 \times 10^{-1}$                | 3.91                                                         |
| $9.00 \times 10^{-2}$            | $4.66 \times 10^{-2}$                                 | $3.41 \times 10^{-1}$                | 3.79                                                         |
| $1.00 \times 10^{-1}$            | $4.15 \times 10^{-2}$                                 | $3.67 \times 10^{-1}$                | 3.67                                                         |
| $2.00 \times 10^{-1}$            | $1.84 \times 10^{-2}$                                 | $5.67 \times 10^{-1}$                | 2.83                                                         |
| $3.00 \times 10^{-1}$            | $1.08 \times 10^{-2}$                                 | $6.91 \times 10^{-1}$                | 2.31                                                         |
| $4.00 \times 10^{-1}$            | $6.91 \times 10^{-3}$                                 | $7.77 \times 10^{-1}$                | 1.94                                                         |
| $5.00 \times 10^{-1}$            | $4.61 \times 10^{-3}$                                 | $8.39 \times 10^{-1}$                | 1.68                                                         |
| $6.00 \times 10^{-1}$            | $3.07 \times 10^{-3}$                                 | $8.87 \times 10^{-1}$                | 1.48                                                         |
| $7.00 \times 10^{-1}$            | $1.97 \times 10^{-3}$                                 | $9.24 \times 10^{-1}$                | 1.32                                                         |
| $8.00 \times 10^{-1}$            | $1.15 \times 10^{-3}$                                 | $9.54 \times 10^{-1}$                | 1.19                                                         |
| $9.00 \times 10^{-1}$            | $5.12 \times 10^{-4}$                                 | $9.79 \times 10^{-1}$                | 1.09                                                         |
| $9.90 \times 10^{-1}$            | $4.65 \times 10^{-5}$                                 | $9.98 \times 10^{-1}$                | 1.01                                                         |

Changing  $K_{p,uu,brain,BCRP,rat}$  from  $1.00 \times 10^{-4}$  to  $9.90 \times 10^{-1}$  with  $PEL_{BCRP,rat}$  of rat cerebrum ( $217 \text{ fmol/cm}^2$ ),  $TA_{BCRP, rat, vivo}/P_{passive, rat, vivo}$  was estimated by Eq. 5. Assuming  $RTA_{BCRP, human/rat}$  is 1.0,  $K_{p,uu,brain,BCRP,human}$  was predicted by Eq. 7 with  $PEL_{BCRP,human}$  of human cerebral cortex ( $41.5 \text{ fmol/cm}^2$ ).
